# Supplementary material for: Investigation of supramolecular architectures of bent-shaped pyridine derivatives: from a three-ring crystalline compound towards five-ring mesogens
Source: Royal Society of Chemistry journal article supplement (doi:10.1039/c6nj01515h), 2016-01-01

**Investigation of supramolecular architectures of bent-shaped pyridine derivatives: from a three-ring crystalline compound towards five-ring mesogens**

Nemanja Trišović,<sup>\*a</sup> Jelena Antanasijević,<sup>a</sup> Jelena Rogan,<sup>a</sup> Dejan Poleti,<sup>a</sup> Tibor Tóth-Katona,<sup>b</sup> Mirosław Salamonczyk,<sup>c</sup> Antal Jákli,<sup>bc</sup> and Katalin Fodor-Csorba<sup>b</sup>

<sup>a</sup> *Faculty of Technology and Metallurgy, University of Belgrade, Belgrade, Serbia. E-mail: ntrisovic@tmf.bg.ac.rs*

<sup>b</sup> *Wigner Research Centre for Physics, Institute for Solid State Physics and Optics of the Hungarian Academy of Sciences, H-1525 Budapest, P.O. Box 49, Hungary*

<sup>c</sup> *Liquid Crystal Institute, Kent State University, Kent, Ohio 44242, USA*

# NMR spectra

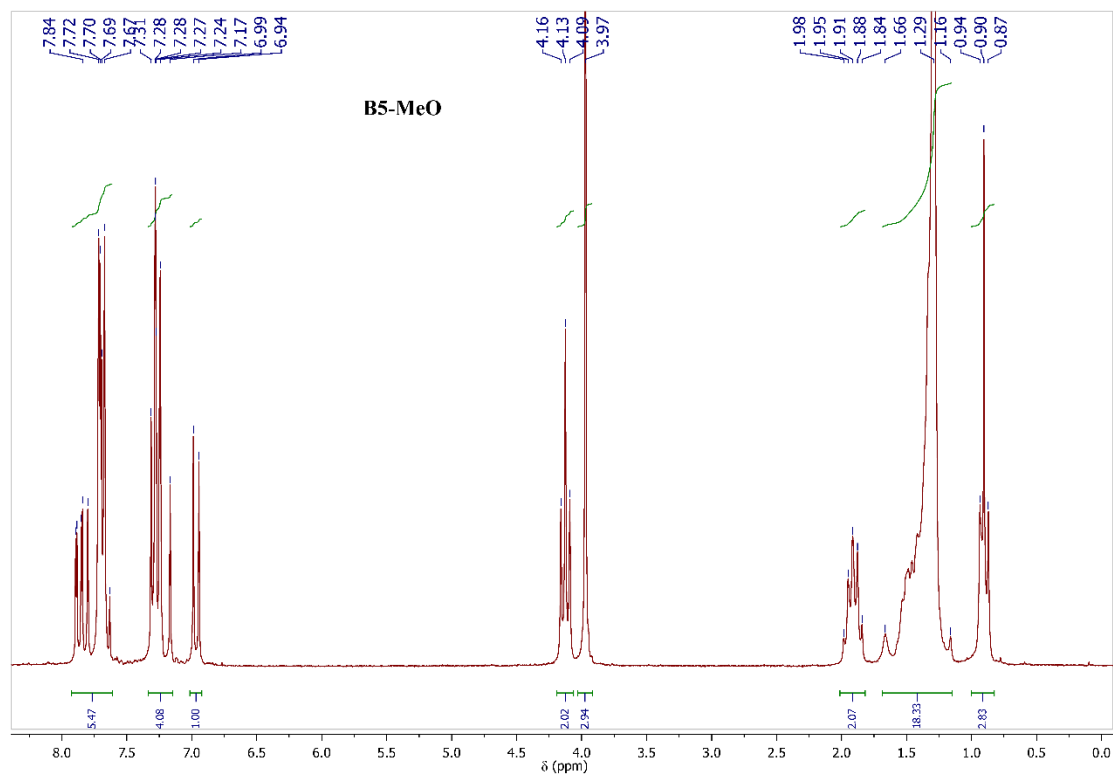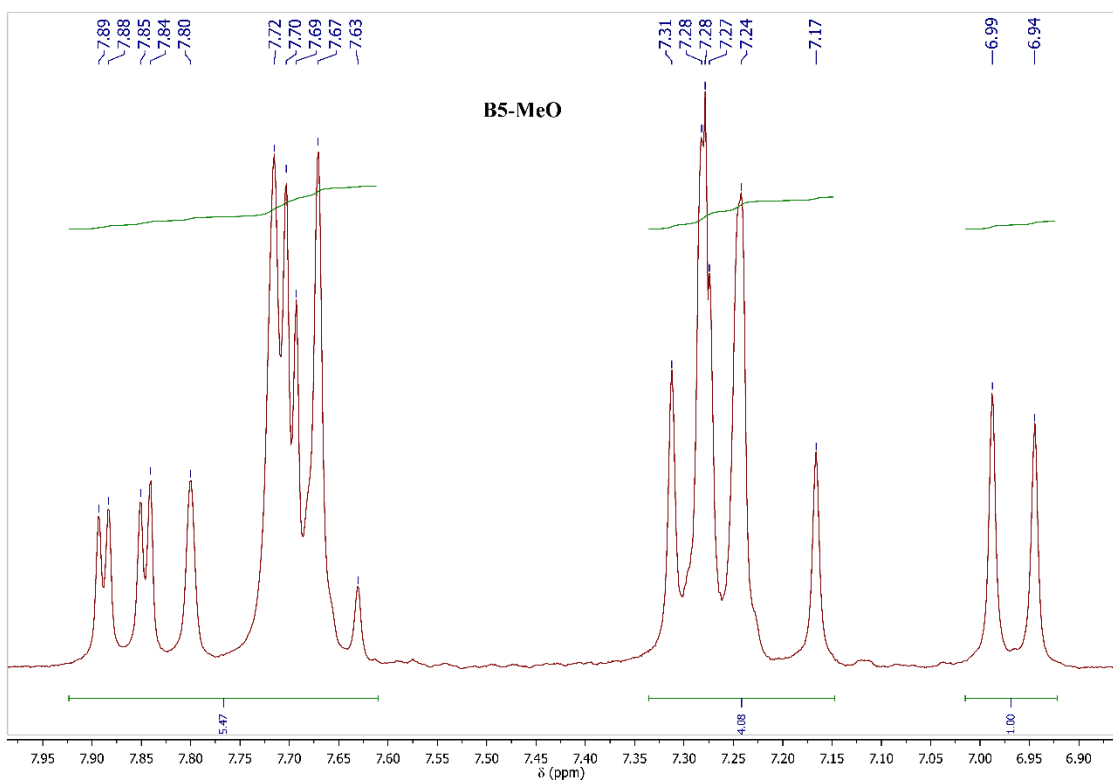

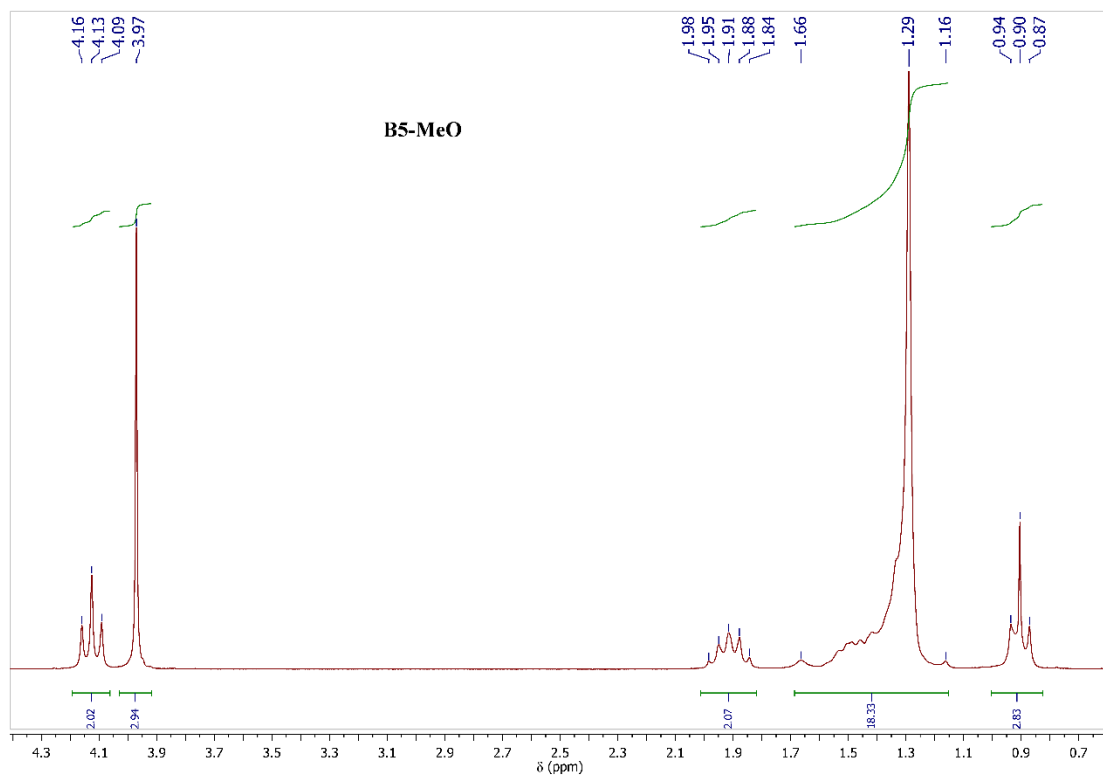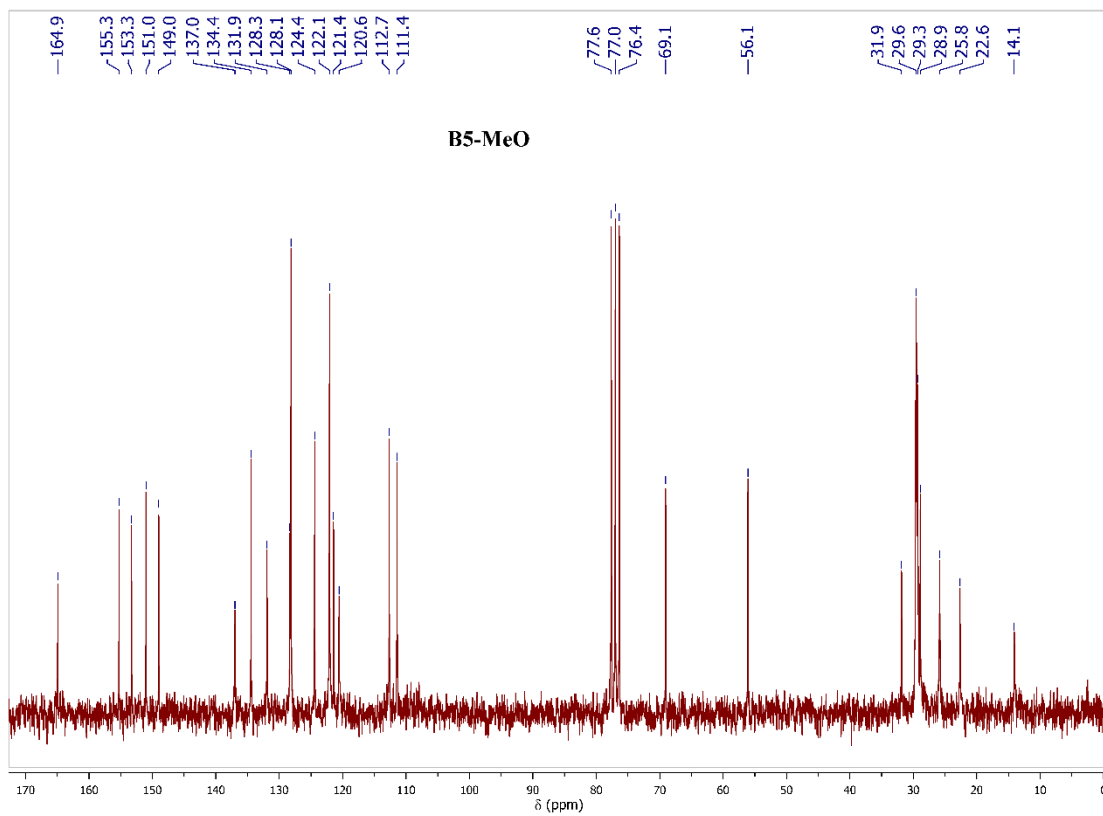

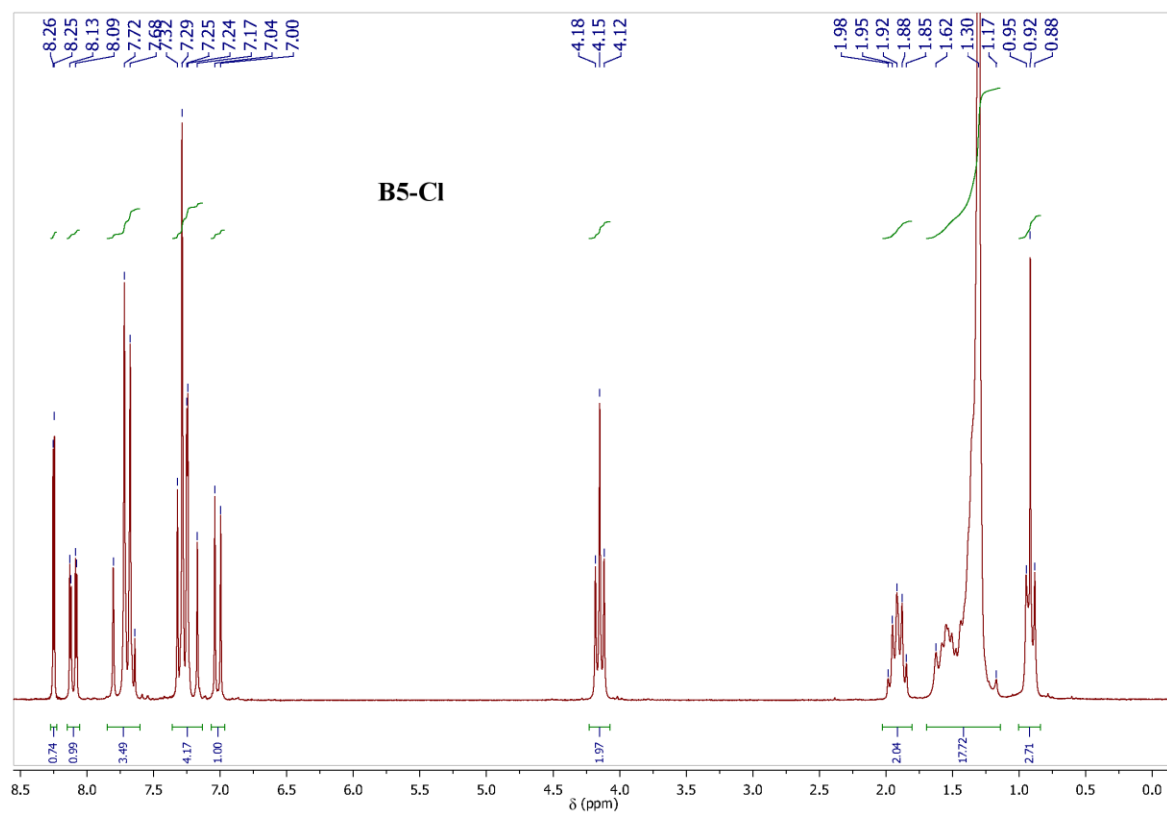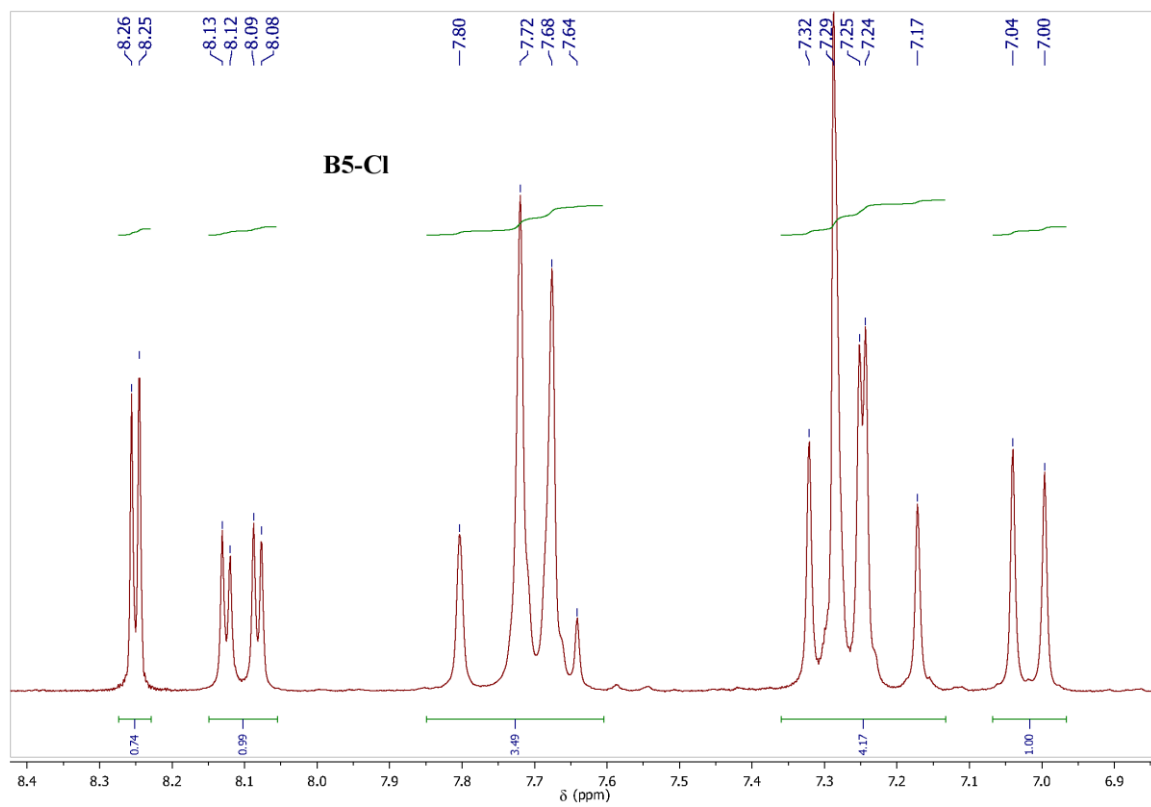

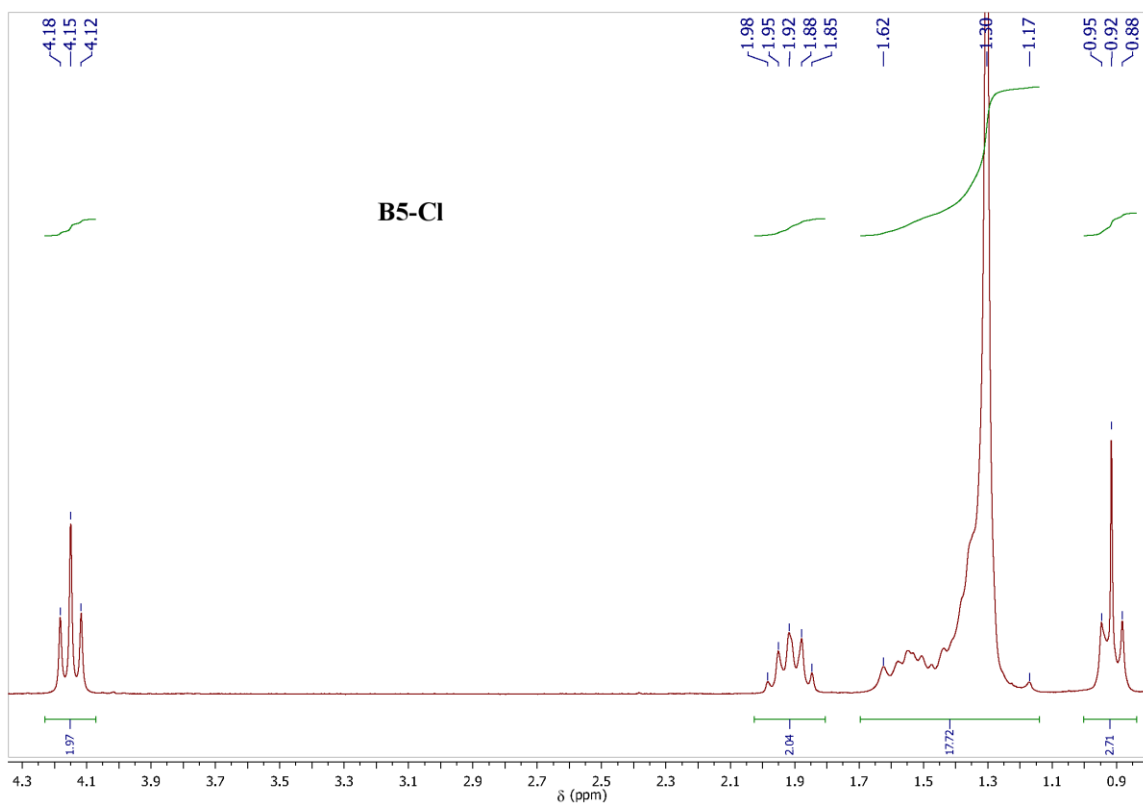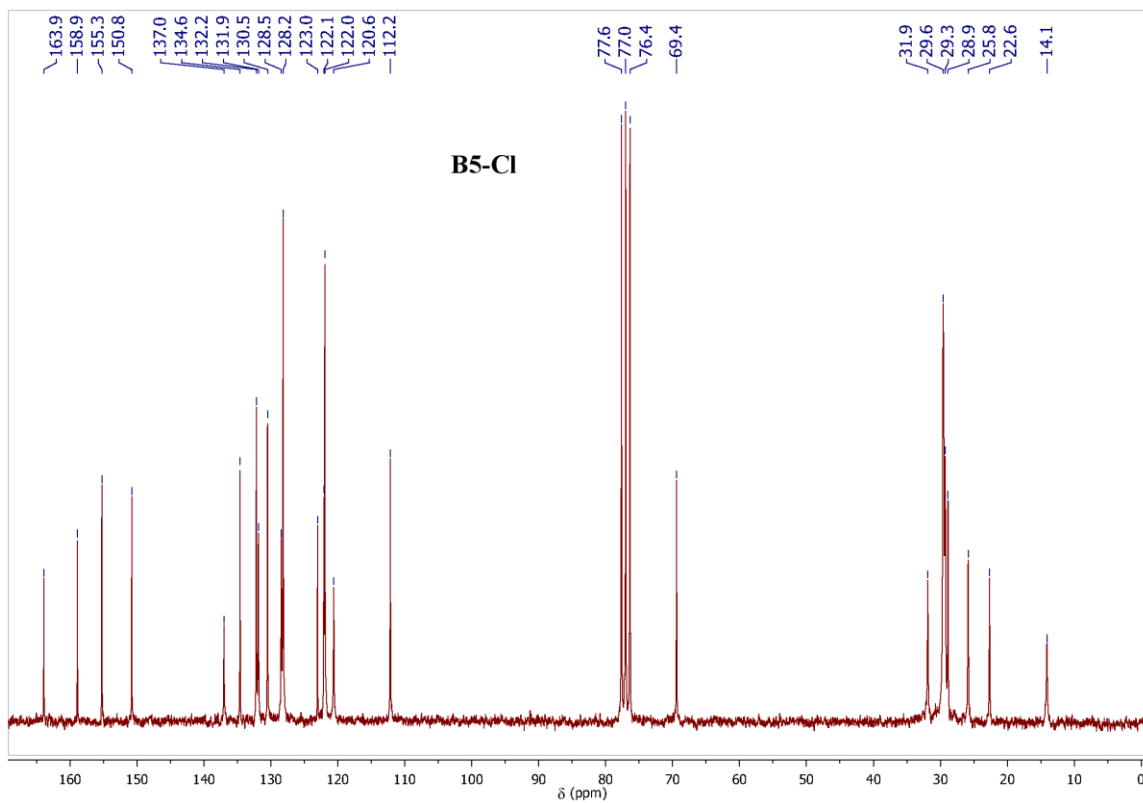

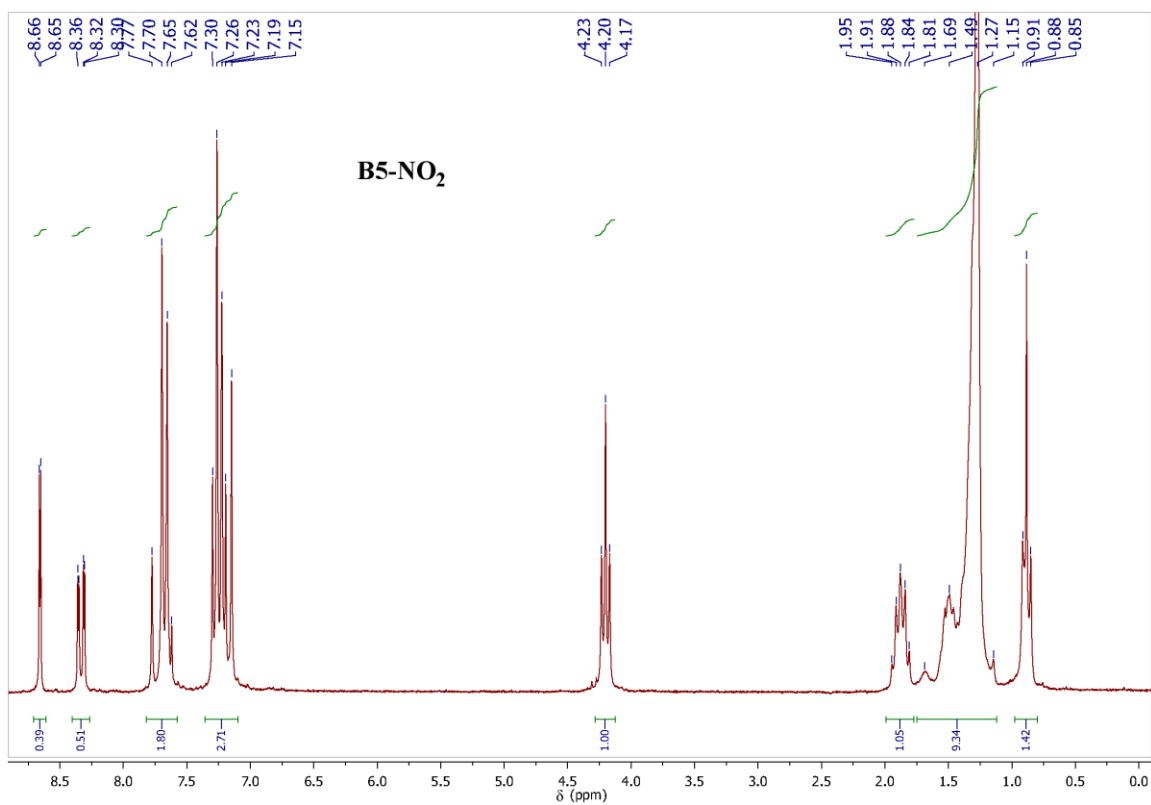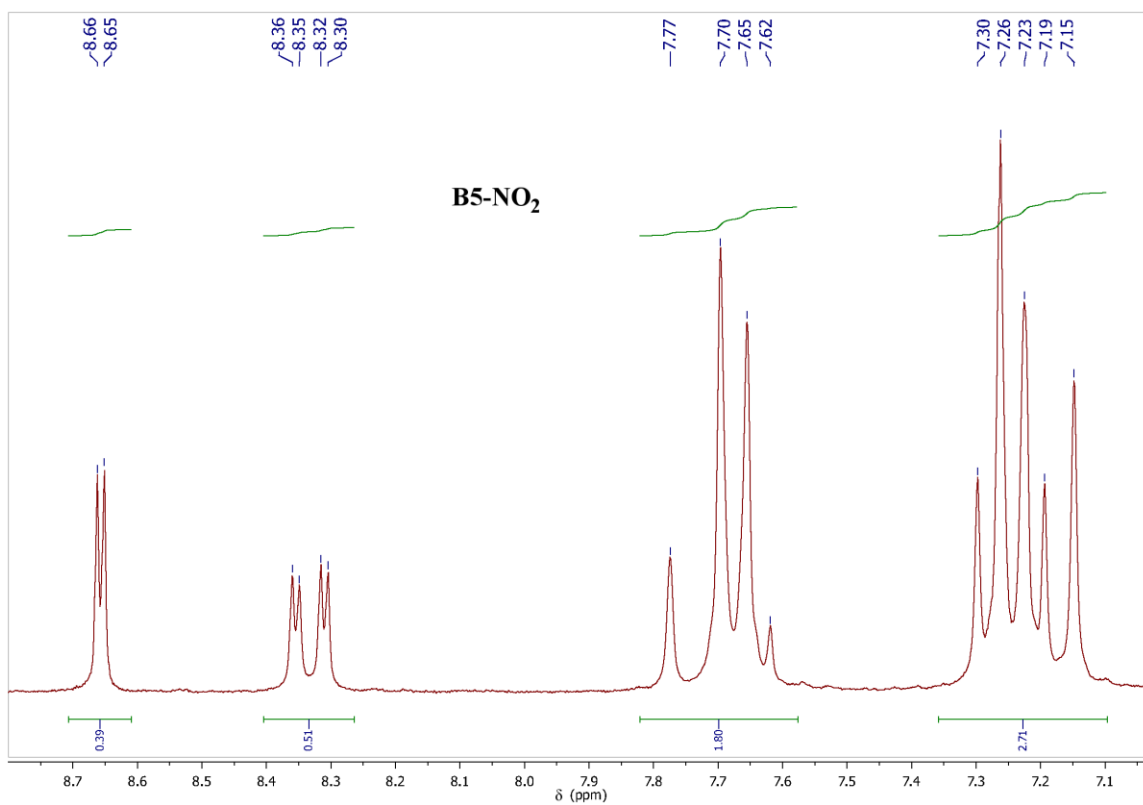

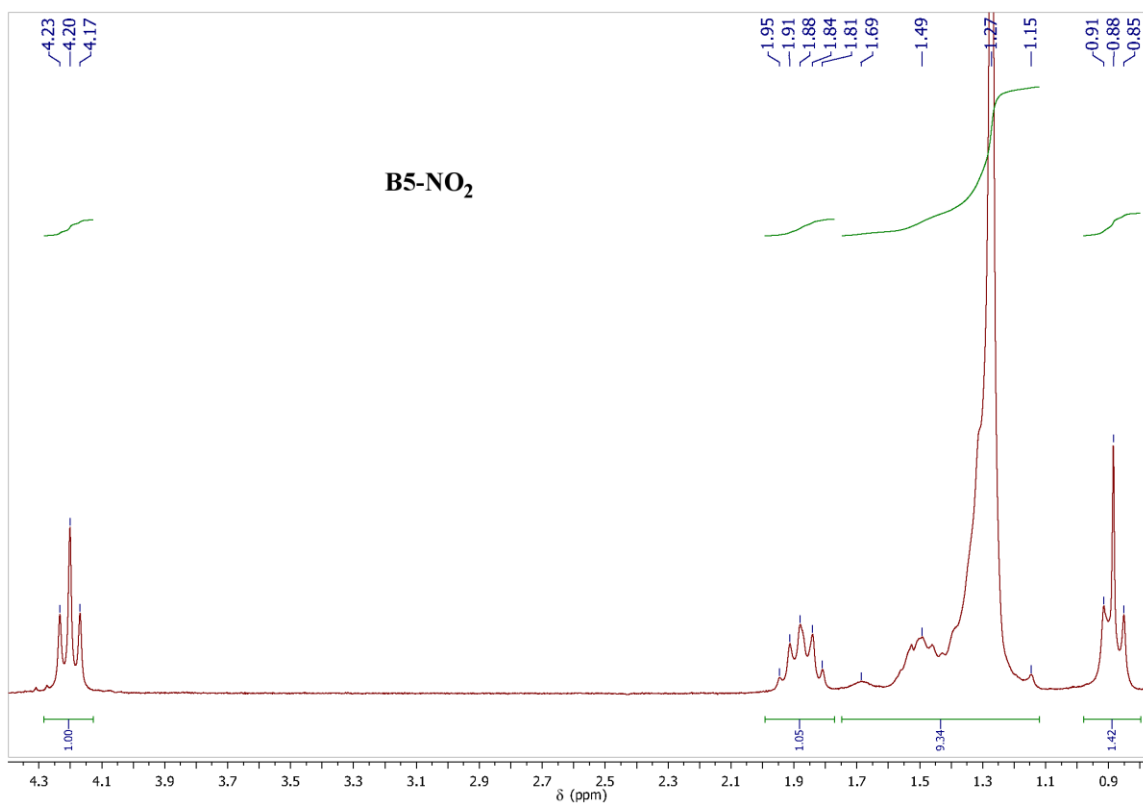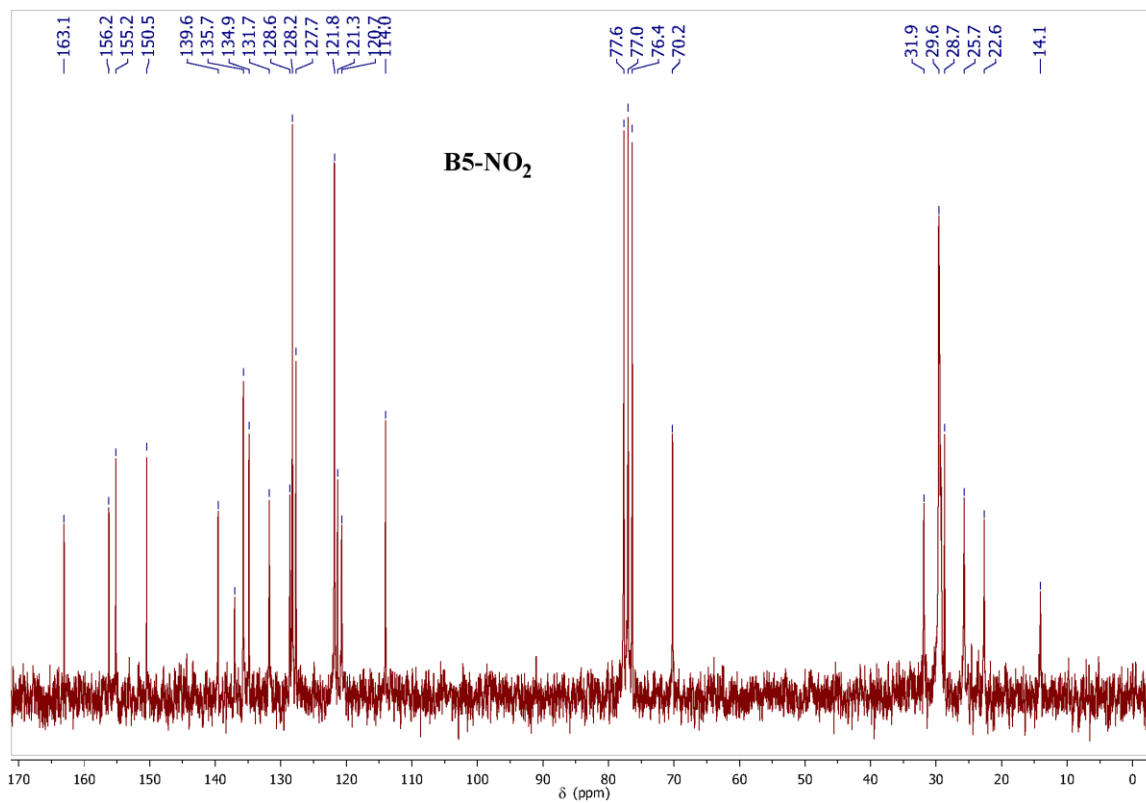

Supplement: c6nj01515h1.pdf [file c6nj01515h1.pdf]
